# Supplementary material for: Highly reliable all-fiber temperature sensor based on the fluorescence intensity ratio (FIR) technique in Er3+/Yb3+ co-doped NaYF4 phosphors
Source: Royal Society of Chemistry journal article supplement (doi:10.1039/c9tc05011f), 2019-01-01
Supplement: c9tc05011f1.pdf [file c9tc05011f1.pdf]

Supplementary Information

Highly reliable all-fiber temperature sensor based on fluorescence intensity ratio (FIR) technique in  $\text{Er}^{3+}/\text{Yb}^{3+}$  co-doped  $\text{NaYF}_4$  phosphors

Hui Zhang,<sup>a</sup> Jiatao Ye,<sup>b</sup> Xiuli Wang,<sup>c</sup> Shilong Zhao,<sup>\*a</sup> Ruoshan Lei,<sup>a</sup> Lihui Huang,<sup>a</sup> and Shiqing Xu,<sup>\*a</sup>

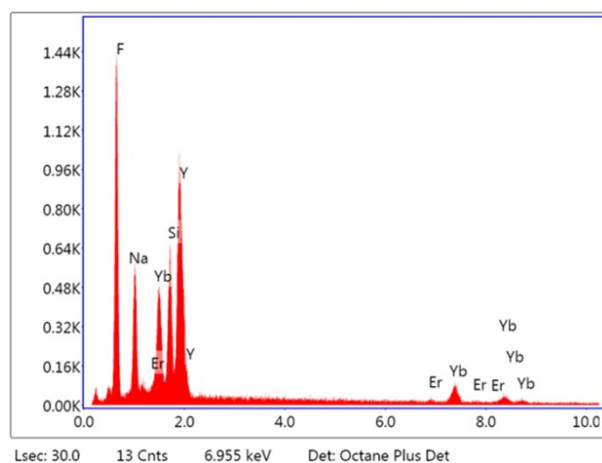

Figure S1. Energy dispersive X-ray spectrum of  $\text{Er}^{3+}/\text{Yb}^{3+}$  codoped NPs.

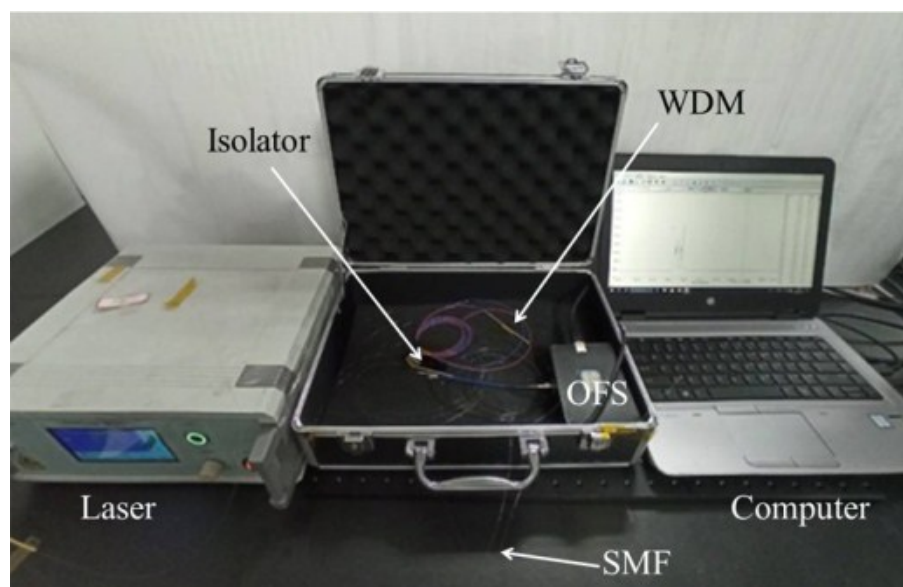

Figure S2. A photograph of the portable all-fiber temperature sensing system.

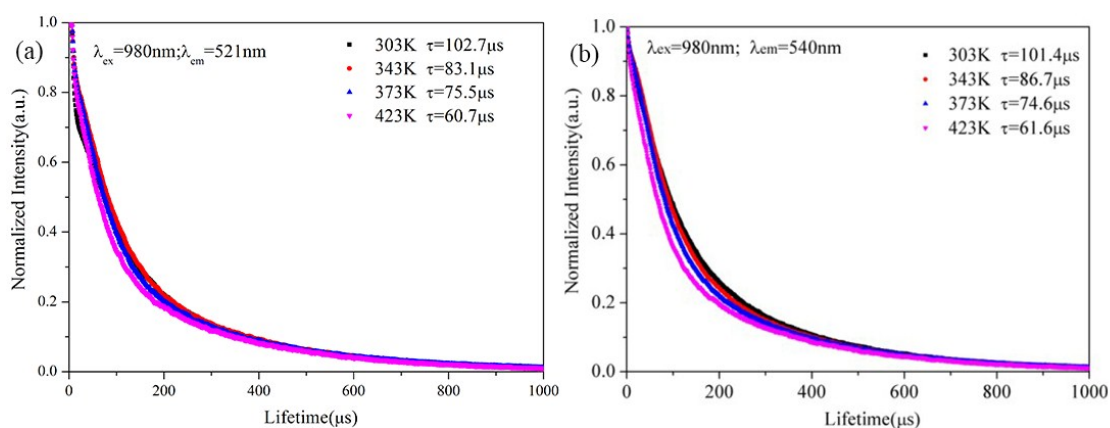

Figure S3. Fluorescence decay curves of 521nm (a) and 540nm (b) upconversion emissions at different temperature.

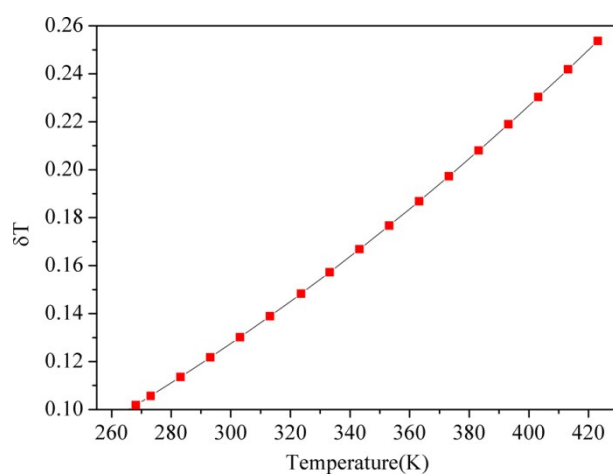

Figure S4.  $\delta T$  as a function of absolute temperature  $T$ .
